# Supplementary material for: Does advance contact with research participants increase response to questionnaires: A Systematic Review and meta-Analysis
Source: medRxiv preprint, doi:10.1101/2021.02.19.21252094, version 1 (2021-02-23)
Supplement: Supplemental Table 2 [file 252094_file09.docx]

Supplementary Table 2: Data Extraction Form

| ID |  |
| --- | --- |
| Intervention Arm(s) |  |
| Control Arm(s) |  |
| Outcome definition |  |
| Number in control arm(s) |  |
| Number in intervention arm(s) |  |
| Number/ rate of return in control arm |  |
| Number /rate of return in intervention arm |  |
| Total number of Participants |  |
| Length of data-collection period |  |
| Setting |  |
| Country |  |
| Questionnaire topic |  |
| Other design comments |  |
| Delay form pre-contact to questionnaire |  |
| Method of per-notification |  |
| Method of sending questionnaire |  |
| Foot-in-the-door? |  |
| Sequence generation |  |
| Allocation confinement |  |
| Participant and personnel blinding |  |
| Blinding of outcome assessment |  |
| Incomplete outcome data |  |
| Selective reporting |  |
| Other bias |  |
